# Supplementary material
Source: PubMed Central journal article supplement (PMC3234380)
Supplement: mmc1.pdf [file mmc1.pdf]

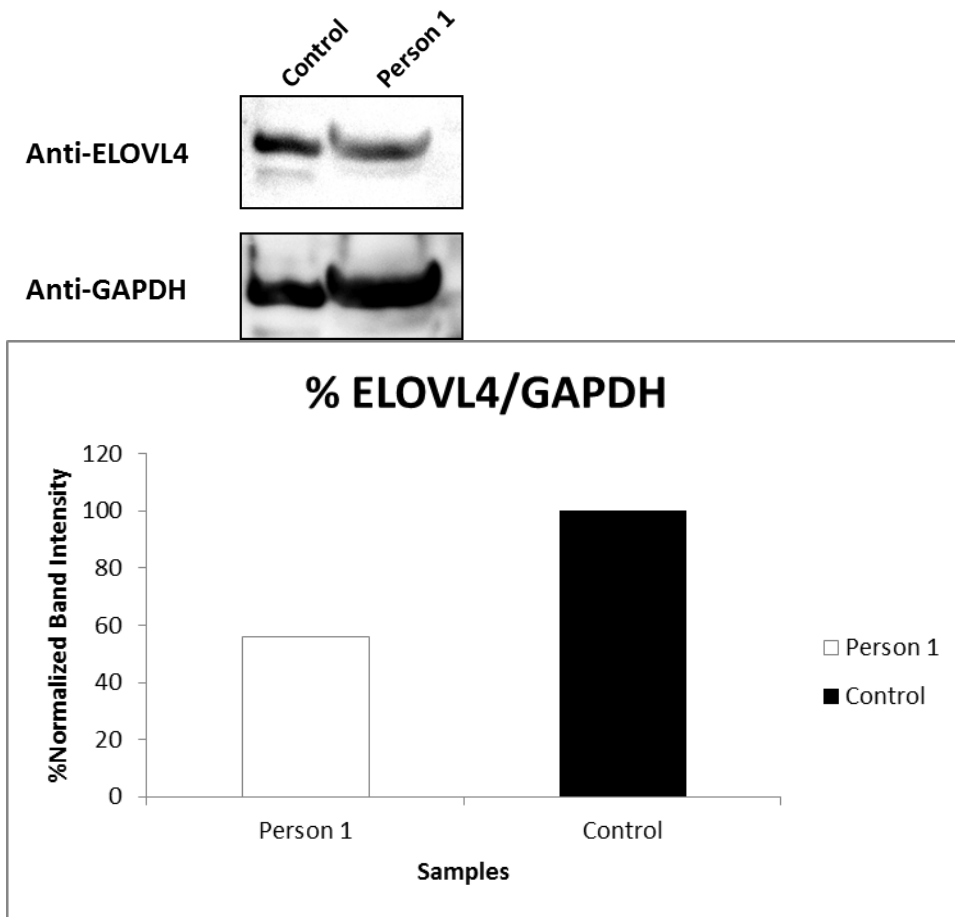

Figure S2. Western blot analysis using ELOVL4 antibody showing reduced abundance of the protein in Person 1 compared to control.

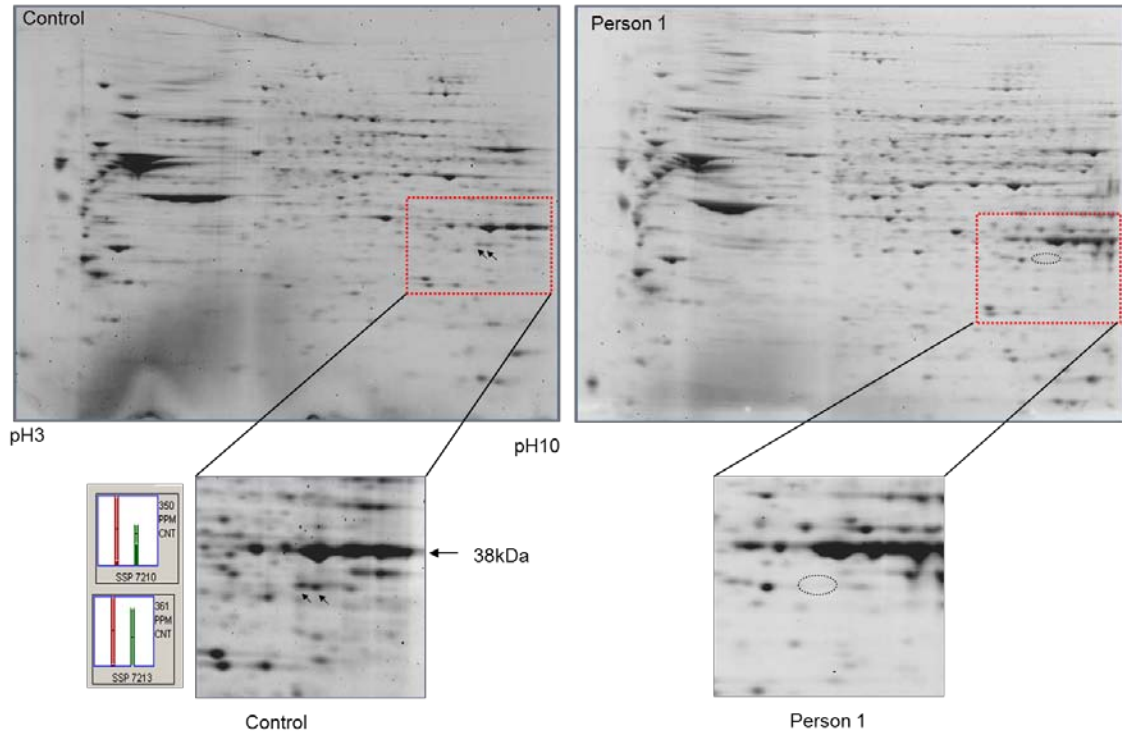

Figure S3. Representative 2-De gels derived from control and Person 1 samples. Whole cell extracts were separated by electrophoresis using IPG 3-10 nonlinear gradient strips in the first dimension and 12.5% homogeneous criterion precast SDS-polyacrylamide gels in the second dimension. Insets are gel segments from basic portion of each gel in the 31-38 kDa molecular mass range showing differentially expressed protein spots (Red bar= control, Green bar = Person 1). Gels were stained with Sypro Ruby fluorescent stain and scanned with Typhoon Trio Imager.

Table S1. Summary of autozygome analysis of Person 1

| Order | ROH Coordinates                           | # Genes | Length (bp) |
|-------|-------------------------------------------|---------|-------------|
| 1     | <a href="#">chr6:10000000-99000000</a>    | 1198    | 89,000,001  |
| 2     | <a href="#">chr10:109600000-113200000</a> | 27      | 3,600,001   |
| 3     | <a href="#">chr10:33400000-36200000</a>   | 20      | 2,800,001   |
| 4     | <a href="#">chr12:23600000-41000000</a>   | 106     | 17,400,001  |
| 5     | <a href="#">chr13:54400000-57000000</a>   | 8       | 2,600,001   |
| 6     | <a href="#">chr16:2700000-6800000</a>     | 105     | 4,100,001   |
| 7     | <a href="#">chr17:22800000-28000000</a>   | 142     | 5,200,001   |
| 8     | <a href="#">chr19:4100000-12500000</a>    | 318     | 8,400,001   |
| 9     | <a href="#">chr21:24800000-37000000</a>   | 180     | 12,200,001  |

Table S2. Filtration strategy used in this study

| ROH                                             | location                                                                  | gene ID                                               | A.A> change                                                                                                                    | Other Saudi exomes                                                                | PolyPhen-2 prediction                   | comments                                                                                    |                                                                                                                                                                                                                            |
|-------------------------------------------------|---------------------------------------------------------------------------|-------------------------------------------------------|--------------------------------------------------------------------------------------------------------------------------------|-----------------------------------------------------------------------------------|-----------------------------------------|---------------------------------------------------------------------------------------------|----------------------------------------------------------------------------------------------------------------------------------------------------------------------------------------------------------------------------|
| chr6:10,000,000-99,000,000                      | 17400067                                                                  | RBM24_CCD54538.1                                      | 'Ile105Thr'                                                                                                                    | No                                                                                | possibly damaging with a score of 0.553 |                                                                                             |                                                                                                                                                                                                                            |
|                                                 | 17741012                                                                  | NUP153                                                | 'Ser=>Cys'                                                                                                                     | Yes                                                                               |                                         |                                                                                             |                                                                                                                                                                                                                            |
|                                                 | 24531897                                                                  | MRS2                                                  | 'Arg=>His'                                                                                                                     | Yes                                                                               |                                         |                                                                                             |                                                                                                                                                                                                                            |
|                                                 | 26032113                                                                  | SUC17A2_CCD54567.1                                    | 'Gly10Asp'                                                                                                                     | No                                                                                | benign with a score of 0.020            |                                                                                             |                                                                                                                                                                                                                            |
|                                                 | 26305063                                                                  | HIST1H3D_CCD54590.1                                   | 'Arg132His'                                                                                                                    | No                                                                                | possibly damaging with a score of 0.778 | not exp in Eye or brain, but in skin                                                        |                                                                                                                                                                                                                            |
|                                                 | 28228923                                                                  | ZNF192_CCD54645.1                                     | 'Gly296Ser'                                                                                                                    | No                                                                                | benign with a score of 0.067            |                                                                                             |                                                                                                                                                                                                                            |
|                                                 | 28441932                                                                  | ZKSCAN3                                               | 'Thr=>Ser'                                                                                                                     | No                                                                                | probably damaging with a score of 1.000 | not in skin but in Eye and Brain                                                            |                                                                                                                                                                                                                            |
|                                                 | 29664134                                                                  | OR2H2                                                 | 'Val=>Ala'                                                                                                                     | No                                                                                | benign with a score of 0.260            |                                                                                             |                                                                                                                                                                                                                            |
|                                                 | 30234156                                                                  | TRIM10_CCD534375.1                                    | 'Thr252Met'                                                                                                                    | No                                                                                | probably damaging with a score of 0.996 | exp only in heart, kidney, and liver                                                        |                                                                                                                                                                                                                            |
|                                                 | 30234204                                                                  | TRIM10                                                | 'Ile=>Thr'                                                                                                                     | No                                                                                | benign with a score of 0.206            |                                                                                             |                                                                                                                                                                                                                            |
|                                                 | 30234264                                                                  | TRIM10                                                | 'Arg216Lys'                                                                                                                    | No                                                                                | benign with a score of 0.000            |                                                                                             |                                                                                                                                                                                                                            |
|                                                 | 30234282                                                                  | TRIM10_CCD534375.1                                    | 'Gln210Leu'                                                                                                                    | No                                                                                | benign with a score of 0.000            |                                                                                             |                                                                                                                                                                                                                            |
|                                                 | 30242966                                                                  | TRIM15                                                | 'Thr=>Met'                                                                                                                     | No                                                                                | benign with a score of 0.000            |                                                                                             |                                                                                                                                                                                                                            |
|                                                 | 31345812                                                                  | HLA-C                                                 | 'Met=>Val'                                                                                                                     | Yes                                                                               |                                         |                                                                                             |                                                                                                                                                                                                                            |
|                                                 | 31346008                                                                  | HLA-C                                                 | 'Met=>Val'                                                                                                                     | Yes                                                                               |                                         |                                                                                             |                                                                                                                                                                                                                            |
|                                                 | 31346238                                                                  | HLA-C                                                 | 'Pro=>His'                                                                                                                     | Yes                                                                               |                                         |                                                                                             |                                                                                                                                                                                                                            |
|                                                 | 31346936                                                                  | HLA-C                                                 | 'Leu=>Trp'                                                                                                                     | Yes                                                                               |                                         |                                                                                             |                                                                                                                                                                                                                            |
|                                                 | 31347781                                                                  | HLA-C                                                 | 'Gly=>Ala'                                                                                                                     | Yes                                                                               |                                         |                                                                                             |                                                                                                                                                                                                                            |
|                                                 | 31430959                                                                  | HLA-B                                                 | 'Val=>Ile'                                                                                                                     | Yes                                                                               |                                         |                                                                                             |                                                                                                                                                                                                                            |
|                                                 | 31431316                                                                  | HLA-B                                                 | 'Ile=>Val'                                                                                                                     | Yes                                                                               |                                         |                                                                                             |                                                                                                                                                                                                                            |
|                                                 | 33144413                                                                  | HLA-DPA1                                              | 'Thr=>Pro'                                                                                                                     | Yes                                                                               |                                         |                                                                                             |                                                                                                                                                                                                                            |
|                                                 | 38921390                                                                  | DNAH8_CCD54838.1                                      | 'Glu1419Asp'                                                                                                                   | No                                                                                | benign with a score of 0.032            |                                                                                             |                                                                                                                                                                                                                            |
|                                                 | 39375468                                                                  | KCNK17_CCD54842.1                                     | 'Pro238Ala'                                                                                                                    | No                                                                                | probably damaging with a score of 0.987 | Not conserved in mouse and Dog, and not expressed in Eye, Brain or Skin                     |                                                                                                                                                                                                                            |
|                                                 | 41108675                                                                  | UNC5CL_CCD54847.1                                     | 'Arg292His'                                                                                                                    | No                                                                                | probably damaging with a score of 0.998 | not exp in either skin or eye                                                               |                                                                                                                                                                                                                            |
|                                                 | 42821532                                                                  | TBCC_CCD54872.1                                       | 'Glu86Asp'                                                                                                                     | No                                                                                | probably damaging with a score of 0.996 | in most of tissues                                                                          |                                                                                                                                                                                                                            |
|                                                 | 51605462                                                                  | PKHD1                                                 | 'Arg=>Leu'                                                                                                                     | Yes                                                                               |                                         |                                                                                             |                                                                                                                                                                                                                            |
|                                                 | 80,885,879                                                                | ELOVL4                                                | CGA=>TGA' (p.R216K; c.646C>T)                                                                                                  | No                                                                                |                                         | high exp in Eye, Brain, and skin                                                            |                                                                                                                                                                                                                            |
|                                                 | 88,372,460                                                                | ORC3L                                                 | Base=A (+2) (spliceSite INDEL)                                                                                                 | Yes                                                                               |                                         |                                                                                             |                                                                                                                                                                                                                            |
|                                                 | chr10:109,600,000-113,200,000                                             | No novel homozygous variants                          |                                                                                                                                |                                                                                   |                                         |                                                                                             |                                                                                                                                                                                                                            |
|                                                 | chr10:33,400,000-36,200,000                                               | 34440159                                              | PARD3                                                                                                                          | c.4015G>C; p.V1339L                                                               | No                                      | probably damaging with a score of 0.988                                                     | in most of tissues, BUT in the knock-out mice showed: mortality/aging, cardiovascular, growth/size, nervous system, limbs/digits/tail, homeostasis, embryogenesis. It did not present any phenotype (s) in vision or skin. |
|                                                 | chr12:23,600,000-41,000,000                                               | 26726071<br>52734373                                  | ITPR2<br>HOXC4                                                                                                                 | Base= +ACTC (spliceSite INDEL (-3))<br>1134V                                      | Yes<br>Yes                              |                                                                                             | <br>not exp. In skin                                                                                                                                                                                                       |
|                                                 | chr13:54,400,000-57,000,000                                               | No novel homozygous variants                          |                                                                                                                                |                                                                                   |                                         |                                                                                             |                                                                                                                                                                                                                            |
|                                                 | chr16:2,700,000-6,800,000                                                 | No novel homozygous variants                          |                                                                                                                                |                                                                                   |                                         |                                                                                             |                                                                                                                                                                                                                            |
|                                                 | chr17:22,800,000-28,000,000                                               | No novel homozygous variants                          |                                                                                                                                |                                                                                   |                                         |                                                                                             |                                                                                                                                                                                                                            |
|                                                 | chr19:4,100,000-12,500,000                                                | 5817736<br>6684582<br>9186252<br>10224251<br>10609382 | FUT5<br>GPR108<br>OR7D4<br>MRPL4<br>SLC44A2                                                                                    | 'His=>Arg'<br>'Thr241Met' (CCDS42479.1)<br>'Arg=>Trp'<br>'Lys=>Thr'<br>'Glu=>Gln' | Yes<br>No<br>Yes<br>Yes<br>Yes          |                                                                                             | <br>probably damaging with a score of 1.000<br><br>in most of tissues, BUT not conserved in chicken, Rat, and Pongo                                                                                                        |
| chr21:24,800,000-37,000,000                     | 30,835,852<br>32,925,799<br>33,870,566<br>3175500<br>31445987<br>33847913 | KRTAP19-6<br>SYN1<br>SON<br>KRTAP11-1<br>TIAM1<br>SON | Base=G<br>Base=AGTATT (+2) (CCDS33539.1), frameshift-INDEL<br>Base=A<br>'Arg=>Gln'<br>'Arg1007His' (CCDS13609.1)<br>'Met=>Ile' | Yes<br>No<br>Yes<br>Yes<br>No<br>Yes                                              |                                         | <br><br>in most of tissues, but not in skin<br>in most of tissues<br><br>in most of tissues |                                                                                                                                                                                                                            |
| We were left with the three variants below:     |                                                                           |                                                       |                                                                                                                                |                                                                                   |                                         |                                                                                             |                                                                                                                                                                                                                            |
| TBCC (MS): NM_003192.2:c.258G>T, p.Glu86Asp     |                                                                           |                                                       |                                                                                                                                |                                                                                   |                                         |                                                                                             |                                                                                                                                                                                                                            |
| ELOVL4 (NS): NM_022726.2:c.646C>T, p.N216K      |                                                                           |                                                       |                                                                                                                                |                                                                                   |                                         |                                                                                             |                                                                                                                                                                                                                            |
| TIAM1 (MS): NM_003253.2:c.3020G>A, p.Arg1007His |                                                                           |                                                       |                                                                                                                                |                                                                                   |                                         |                                                                                             |                                                                                                                                                                                                                            |

Table S3. gDNA primers for ELOVL4 and cDNA primers for ALDH3A

| ELOVL4 gDNA ID | Forward                  | Reverse                   | Ta (°C) |
|----------------|--------------------------|---------------------------|---------|
| ELOVL4_Ex-1    | CTTTCTCCCGGGAACCTT       | CGGATCAGATTAACCAAGTGC     | 59      |
| ELOVL4_Ex-2    | TTTTTTGTGGGACTCAAAGG     | TTCAATGCCAGAACAGCTAA      | 59      |
| ELOVL4_Ex-3    | AGCAATCGGAATGCATGA       | ACCCGTAGTCCCAGCTACTT      | 59      |
| ELOVL4_Ex-4    | CCATGGAGAGATGCTTAGGTT    | GGAAATGATTAACCATGAAAGC    | 59      |
| ELOVL4_Ex-5    | ATCTAGCTTAATCTGAAGGAAAA  | GATTTGCTGGGACCAATAAG      | 59      |
| ELOVL4_Ex-6    | CATGGGAGCCAGAAAACA       | ACATCTGGGTATGGTATTAACACTT | 59      |
| ALDH3A2_cDNA_1 | GAGTGAATTGTGGCTGTGG      | CCCGTATAGAAAATGTGGTCA     | 58      |
| ALDH3A2_cDNA_2 | GCCTTCTGAACTGAGTGAAAA    | CTCCACTGGATGTCTCATCA      | 58      |
| ALDH3A2_cDNA_3 | TGAAAAATGTAGATGAGGCCATAA | GGCAACTTTTATTAATGATGAATGG | 58      |
